# Supplementary material for: A Novel Method Using Fine Needle Aspiration from Tumor-Draining Lymph Nodes Could Enable the Discovery of New Prognostic Markers in Patients with Cutaneous Squamous Cell Carcinoma
Source: MDPI journal article supplement (doi:10.3390/cancers15133297), 2023-06-22
Supplement: s1 [file s1]

## Supplementary Materials

**Table S1. Patient characteristics.**

| Patient | Sex | Age at diagnosis | ICD10        | Localisation | pTNM classification |    |    | Oncological treatment |     |      | Follow-up |                          |                               | PAD            |
|---------|-----|------------------|--------------|--------------|---------------------|----|----|-----------------------|-----|------|-----------|--------------------------|-------------------------------|----------------|
|         |     |                  |              |              | pT                  | pN | pM | CTH                   | RTH | BTRT | Relapse   | Time to relapse (months) | Time without relapse (months) |                |
| 1.      | M   | 81               | C442S        | Ytteröra     | pT1                 | NO | 0  | yes                   | no  |      | no        | -                        | 17                            | Medelhögt diff |
| 2.      | M   | 84               | C442S        | Ytteröra     | pT2                 | NO | 0  | yes                   | no  |      | no        | -                        | 18                            | Medelhögt diff |
| 3.      | M   | 85               | C440         | Underläpp    | pT2                 | N0 | 0  | no                    | yes | yes  | no        | -                        | 17                            | Medelhögt diff |
| 4.      | M   | 81               | C443S        | Kind         | pT2                 | N0 | 0  | yes                   | no  |      | no        | -                        | 18                            | Medelhögt diff |
| 5.      | M   | 77               | C442S        | Ytteröra     | pT2                 | N0 | 0  | yes                   | no  |      | no        | -                        | 17                            | Medelhögt diff |
| 6.      | F   | 85               | C443<br>C770 | Skalpen      | PT2                 | N1 | 0  | yes                   | no  |      | no        | -                        | 18                            | Medelhögt diff |

**Table S2. Antibody panels for flow cytometry analysis.**

| <b>Antigen</b>       | <b>Fluorochrome</b> | <b>Clone</b> | <b>Cat #</b> | <b>Antibody supplier</b> |
|----------------------|---------------------|--------------|--------------|--------------------------|
| CD20                 | BUV395              | 2H7          | 563782       | BD                       |
| CD45                 | BUV805              | HI30         | 612891       | BD                       |
| CLTA4<br>(CD152)     | BV421               | BNI3         | 562743       | BD                       |
| CD8                  | BV510               | RPA-T8       | 563256       | BD                       |
| CD127                | BV711               | HIL-7R-M21   | 563165       | BD                       |
| CD25                 | FITC/ BB515         | M-A251       | 555431       | BD                       |
| PD1<br>(CD279)       | PE                  | EH12.1       | 560795       | BD                       |
| CD4                  | PerCp 5.5           | 13B8.2       | A07752       | Beckman Coulter          |
| HLA-DR               | PE-Cy7              | G46-6        | 560651       | BD                       |
| Live Dead<br>Far Red | APC                 |              | L10120       | Beckman Coulter          |
| CD3                  | AF-700              | SP34-2       | 557917       | BD                       |
| CD69                 | APC-Cy7             | FN50         | 557756       | BD                       |

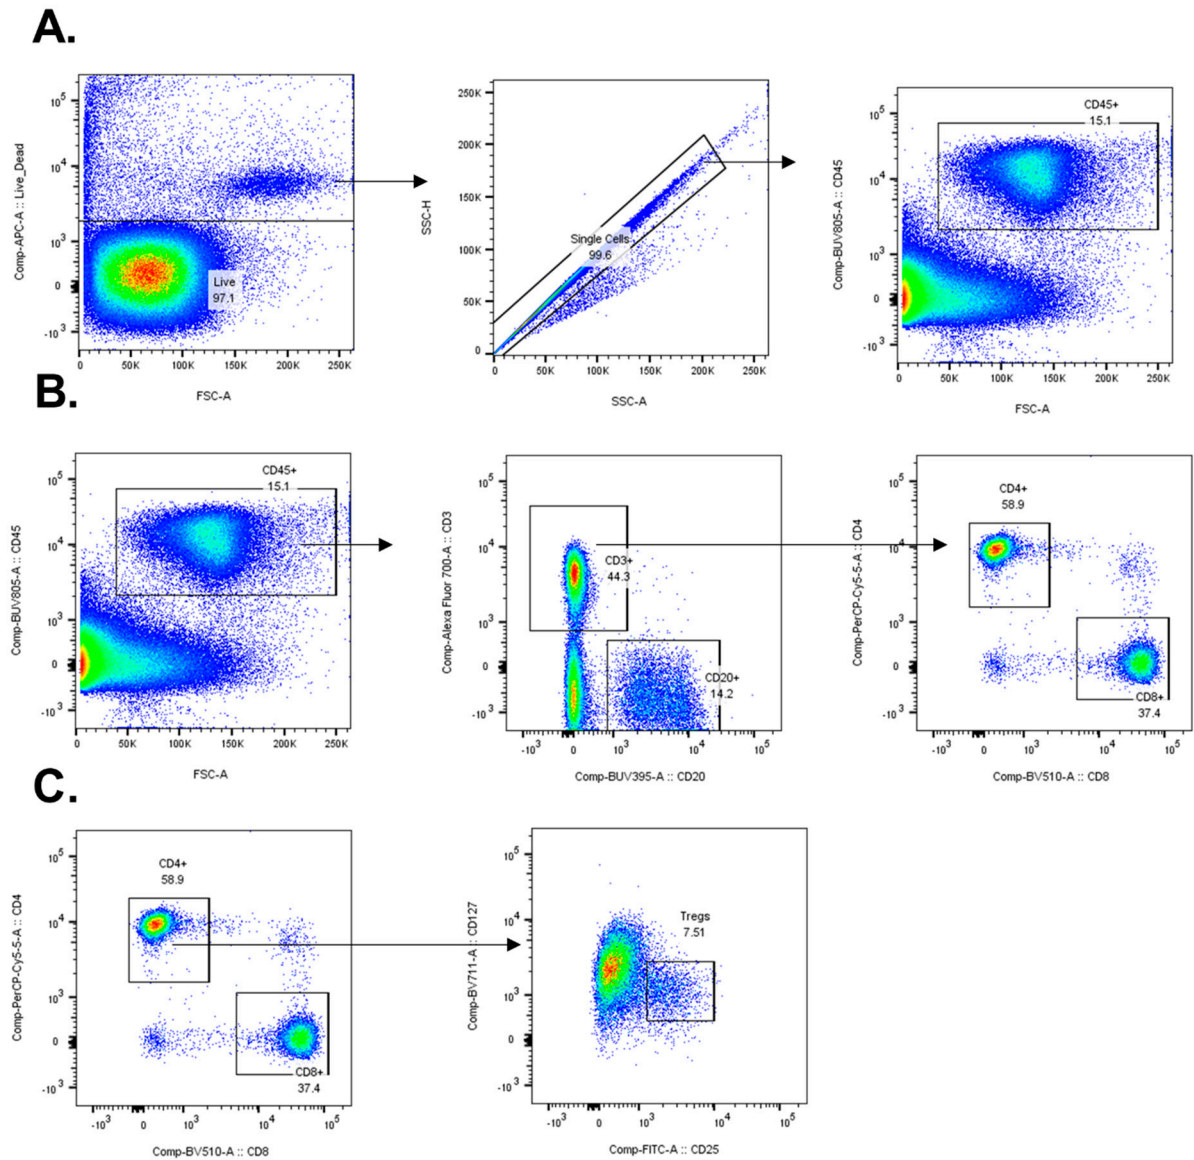

**Figure S1. Gating strategy of lymphocytes from PBMC, TDLN and tumor.** A. Live cells were gated followed by single cells and CD45<sup>+</sup> cells. B. CD20<sup>+</sup> cells and CD3<sup>+</sup> cells were gated from CD45<sup>+</sup> cells. CD4<sup>+</sup> and CD8<sup>+</sup> cells were gated from the cells that were CD3<sup>+</sup>. C. Tregs were gated from the CD4<sup>+</sup> cells.
